# Supplementary material for: Metabolomics of Escherichia coli for Disclosing Novel Metabolic Engineering Strategies for Enhancing Hydrogen and Ethanol Production
Source: MDPI journal article supplement (doi:10.3390/ijms241411619), 2023-07-18

## SUPPLEMENTARY MATERIAL

**Table S1.** List of the more significant wavenumber peaks (cm<sup>-1</sup>) obtained in FT-IR loading plot (DF1) in the positive axis referred to in Fig S1.

| Peak (cm <sup>-1</sup> ) | Bond   | Range     | Intensity       | Group                                 | Classification       | Mode                     |
|--------------------------|--------|-----------|-----------------|---------------------------------------|----------------------|--------------------------|
| 1030                     | C-O    | 1075-1000 | strong          | HO-R-OH                               | Alcohols             | stretching               |
| 1119                     | C-O    | 1090-1125 | strong          | R <sup>2</sup> CH-OH                  | Alcohols             | stretching               |
| 1119                     | C-O    | 1100-1210 | strong          | R <sup>3</sup> C-OH                   | Alcohols             | stretching               |
| 1165                     | C-O    | 1100-1000 | strong          | HO-R-OH                               | Alcohols             | stretching               |
| 1242                     | C-O    | 1260-1180 | strong          | Ph-OH                                 | Alcohols             | stretching               |
| 2853                     | CH     | 2900-2800 | weak            | C=CC=C-CHO                            | Aldehydes            | stretching               |
| 1242                     | CC     | 1250-1200 | medium          | C-(CH <sub>3</sub> ) <sub>3</sub>     | Alkanes              | skeletal vibration       |
| 2924                     | CH     | 3000-2900 | medium          | Cyclohexil                            | Alkanes              | symmetric                |
| 2924                     | CH     | 2930-2920 | medium          | Ph-CH <sub>3</sub>                    | Alkanes              | antisymmetric            |
| 1242                     | C-N    | 1200-1320 | medium          | R-CO-NH-CO-NHR                        | Amides               | stretching               |
| 1242                     | NH     | 1200-1305 | medium-weak     | R-CO-NH-C                             | Amides               | combination              |
| 1549                     | NH     | 1570-1515 | strong          | R-CO-NH-C                             | Amides               | combination              |
| 1701                     | C=O    | 1650-1750 | strong          | R-CO-NH-CO-NHR                        | Amides               | stretching               |
| 1030                     | C-N    | 1038-1022 | weak            | (R) <sup>3</sup> C-NH <sub>2</sub>    | Amines               | stretching               |
| 1119                     | C-N    | 1140-1080 | weak-medium     | (R) <sup>2</sup> CH-NH <sub>2</sub>   | Amines               | stretching               |
| 1242                     | C-O    | 1211-1320 | strong          | Ph-COOH                               | Carbo-acids          | stretching               |
| 1242                     | C-O    | 1320-1211 | strong          | COOH                                  | Carbo-acids          | stretching               |
| 1701                     | C=O    | 1700-1725 | strong          | C-C-COOH                              | Carbo-acids          | stretching               |
| 2924                     | O-H    | 3100-2900 | medium-weak     | C-C-COOH                              | Carbo-acids          | stretching               |
| 1119                     | C-O-C  | 1300-1100 | medium          | COO                                   | Esters               | stretching               |
| 1119                     | C-O-C  | 1300-1100 | strong          | CICOOC                                | Esters               | stretching               |
| 1242                     | C-O-C  | 1100-1300 | medium          | COO                                   | Esters               | stretching               |
| 1242                     | C-O-C  | 1100-1300 | strong          | CICOOC                                | Esters               | stretching               |
| 1242                     | C-O    | 1160-1300 | strong          | C=C-COOR                              | Esters               | stretching               |
| 1119                     | C-O-C  | 1060-1150 | variable-strong | RCH <sub>2</sub> -O-CH <sub>2</sub> R | Ethers               | antisymmetric stretching |
| 1242                     | C-O-C  | 1280-1230 | medium          | 3-ring ethers                         | Ethers               | symetric stretching      |
| 1242                     | C-O-C  | 1210-1310 | variable strong | Ph-O-C                                | Ethers               | antisymmetric stretching |
| 1030                     | P-O    | 1040-910  | strong          | (R) <sup>2</sup> P-OH                 | Phosphorus compounds | stretching               |
| 1119                     | P=N    | 1100-1300 | medium          | Cyclic P=N                            | Phosphorus compounds | stretching               |
| 1242                     | P=N    | 1300-1100 | medium-strong   | Cyclic P=N                            | Phosphorus compounds | stretching               |
| 1242                     | P-O-Ph | 1160-1260 | strong          | (R) <sup>3</sup> P=O                  | Phosphorus compounds | stretching               |

**Table S2. List of 160 annotated compounds from GC-MS with match factor >75**

| Variable ID | Time Retention | Name.1                               | EcoCyc name (consensus)      | Compound matched in EcoCyc | Redundant | Match Factor |
|-------------|----------------|--------------------------------------|------------------------------|----------------------------|-----------|--------------|
| 186         | 13.4475        | (-)-Epinephrine                      | (-)-Epinephrine              | Non                        | Non       | 99.41        |
| 197         | 13.768         | 1,6-Anhydroglucose                   |                              |                            | Redundant | 79.8         |
| 212         | 14.2804        | 1,6-Anhydroglucose                   | Lactitol                     |                            | Non       | 77.15        |
| 39          | 7.1864         | 2-Hydroxypyridine                    | 2-Hydroxypyridine            | Non                        | Non       | 99.33        |
| 65          | 8.4223         | 3,4-Dihydroxy-L-phenylalanine (4TMS) |                              |                            | Redundant | 86.02        |
| 164         | 12.4737        | 3,4-Dihydroxy-L-phenylalanine (4TMS) |                              |                            | Redundant | 91.01        |
| 195         | 13.7153        | 3,4-Dihydroxy-L-phenylalanine (4TMS) |                              |                            | Redundant | 90.04        |
| 255         | 16.0798        | 3,4-Dihydroxy-L-phenylalanine (4TMS) | L-dopa                       |                            | Non       | 96.55        |
| 66          | 8.6933         | 4-Hydroxypyridine                    | 4-Hydroxypyridine            | Non                        | Non       | 98.06        |
| 290         | 17.6208        | 5-Aminovaleric acid                  | 5-aminopentanoate            |                            | Non       | 88.46        |
| 235         | 15.2356        | 5-Hydroxytryptamine (5TMS)           | Cadaverine                   |                            | Redundant | 81.06        |
| 321         | 19.801         | 5-Hydroxytryptamine (5TMS)           |                              |                            | Redundant | 87.39        |
| 333         | 21.3294        | 5-Methylthioadenosine                | S-methyl-5'-thioadenosine    |                            | Non       | 94.19        |
| 179         | 13.0665        | 6-Hydroxynicotinic acid              | 6-Hydroxynicotinic acid      | Non                        | Non       | 86.61        |
| 247         | 15.6664        | Adenine (2TMS)                       | Adenine                      |                            | Non       | 85.37        |
| 136         | 11.2154        | Alanylalanine                        | Hypotaurine                  |                            | Non       | 76.76        |
| 103         | 10.0902        | Benzoic acid                         | Benzoate                     |                            | Non       | 92.5         |
| 297         | 17.9881        | Cadaverine (4TMS)                    | Cadaverine                   |                            | Non       | 93.82        |
| 232         | 15.1224        | Citric acid (4TMS)                   | Citrate                      |                            | Non       | 85.15        |
| 44          | 7.4491         | Creatinine                           | Creatinine                   | Non                        | Non       | 79.47        |
| 29          | 6.704          | D-(-)-Arabinose (4TMS;1MEOX)         | D-arabinose                  |                            | Non       | 89.56        |
| 242         | 15.4502        | D-(+)-Fucose                         | D-Fucose                     |                            | Non       | 80.26        |
| 287         | 17.4727        | D-(+)-Fucose                         | D-Fucose                     |                            | Redundant | 79.65        |
| 183         | 13.3331        | D-3-Phenyllactic acid                | Protocatechuate              |                            | Non       | 91.73        |
| 278         | 17.119         | D-Arabinose-5-phosphate              | D-arabinose 5-phosphate      |                            | Non       | 81.06        |
| 279         | 17.1155        | D-Arabinose-5-phosphate              |                              |                            | Redundant | 78.3         |
| 24          | 6.3781         | D-Galactosamine (5TMS)               | D-galactosamine              |                            | Non       | 88.45        |
| 154         | 12.0402        | D-Homoserine                         | D-homoserine                 |                            | Non       | 87.64        |
| 210         | 14.1603        | DethioBiotin                         | Dethiobiotin                 |                            | Non       | 92.4         |
| 37          | 7.0306         | DL-2,3-Diaminopropionic acid (2TMS)  | DL-2,3-Diaminopropionic acid | Non                        | Non       | 96.14        |
| 201         | 13.96          | DL-Homocysteine (3TMS)               | L-Homocysteine               |                            | Non       | 90.33        |
| 86          | 9.606          | DL-Norvaline                         | DL-norvaline                 |                            | Non       | 97.73        |
| 304         | 18.7337        | DL-Norvaline                         |                              |                            | Redundant | 78.26        |

|     |         |                              |                       |     |           |       |
|-----|---------|------------------------------|-----------------------|-----|-----------|-------|
| 317 | 19.4096 | DL-Norvaline                 |                       |     | Redundant | 97    |
| 188 | 13.5286 | DL-Pipecolic acid            |                       |     | Redundant | 97.27 |
| 237 | 15.2919 | DL-Pipecolic acid            |                       |     | Redundant | 89.12 |
| 259 | 16.2234 | DL-Pipecolic acid            |                       |     | Redundant | 97.59 |
| 271 | 16.9119 | DL-Pipecolic acid            |                       |     | Redundant | 97.5  |
| 272 | 16.865  | DL-Pipecolic acid            |                       |     | Redundant | 97.73 |
| 280 | 17.1564 | DL-Pipecolic acid            |                       |     | Redundant | 88.63 |
| 283 | 17.3511 | DL-Pipecolic acid            |                       |     | Redundant | 97.28 |
| 289 | 17.6387 | DL-Pipecolic acid            | DL-Pipecolic acid     | Non | Non       | 98.5  |
| 293 | 17.7523 | DL-Pipecolic acid            |                       |     | Redundant | 95.79 |
| 294 | 17.791  | DL-Pipecolic acid            |                       |     | Redundant | 96.34 |
| 299 | 18.2635 | DL-Pipecolic acid            |                       |     | Redundant | 90.53 |
| 312 | 19.1198 | DL-Pipecolic acid            |                       |     | Redundant | 97.91 |
| 318 | 19.5122 | DL-Pipecolic acid            |                       |     | Redundant | 93.32 |
| 320 | 19.7515 | DL-Pipecolic acid            |                       |     | Redundant | 89.11 |
| 172 | 12.8043 | DL-Pyroglutamic acid         | 5-oxo-D-proline       |     | Non       | 90.53 |
| 91  | 9.7993  | Dopamine                     |                       |     | Redundant | 98.6  |
| 105 | 10.2022 | Dopamine                     | Dopamine              |     | Non       | 98.98 |
| 142 | 11.5638 | Dopamine                     |                       |     | Redundant | 98.82 |
| 147 | 11.707  | Dopamine                     |                       |     | Redundant | 94.48 |
| 156 | 12.0834 | Dopamine                     |                       |     | Redundant | 98.65 |
| 191 | 13.5939 | Dopamine                     |                       |     | Redundant | 97.66 |
| 194 | 13.7332 | Dopamine                     |                       |     | Redundant | 96.82 |
| 218 | 14.5786 | Dopamine                     |                       |     | Redundant | 97.52 |
| 231 | 15.1457 | Dopamine                     |                       |     | Redundant | 94.95 |
| 238 | 15.3373 | Dopamine                     |                       |     | Redundant | 97.04 |
| 244 | 15.5884 | Dopamine                     |                       |     | Redundant | 97.44 |
| 264 | 16.4116 | Dopamine                     |                       |     | Redundant | 98.06 |
| 282 | 17.2907 | Dopamine                     |                       |     | Redundant | 96.75 |
| 286 | 17.4317 | Dopamine                     |                       |     | Redundant | 96    |
| 307 | 18.9179 | Dopamine                     |                       |     | Redundant | 98.22 |
| 311 | 19.0727 | Dopamine                     |                       |     | Redundant | 95.95 |
| 323 | 20.0659 | Dopamine                     |                       |     | Redundant | 95.2  |
| 328 | 20.3835 | Dopamine                     |                       |     | Redundant | 88.57 |
| 330 | 20.9505 | Dopamine                     |                       |     | Redundant | 94    |
| 132 | 11.1082 | Fumaric acid (2TMS)          | Fumarate              |     | Non       | 90.02 |
| 202 | 13.9698 | Galactitol                   | Galactitol            |     | Non       | 78.62 |
| 71  | 8.9401  | Gallic acid                  |                       |     | Redundant | 89.21 |
| 82  | 9.4217  | Gallic acid                  | Gallate               |     | Non       | 89.55 |
| 182 | 13.2144 | Glutathione disulfide (xTMS) | glutathione disulfide |     | Non       | 92.06 |
| 253 | 15.924  | Glutathione disulfide (xTMS) | glutathione disulfide |     | Redundant | 81.06 |
| 80  | 9.4145  | Glycerol (3TMS)              | Glycerol              |     | Non       | 77.12 |
| 216 | 14.3706 | Glycerol-2-phosphate         | Glycerol 2-phosphate  |     | Non       | 81.67 |

|     |         |                         |                      |     |           |       |
|-----|---------|-------------------------|----------------------|-----|-----------|-------|
| 50  | 7.7507  | Glycolic acid (2TMS)    | Glycolate            |     | Non       | 85.33 |
| 51  | 7.7549  | Glycolic acid (2TMS)    |                      |     | Redundant | 84.76 |
| 42  | 7.3599  | Harmaline (1TMS)        | Harmaline            |     | Non       | 93.71 |
| 173 | 12.8292 | Harmaline (1TMS)        |                      |     | Redundant | 90.33 |
| 292 | 17.6973 | Harmaline (1TMS)        |                      |     | Redundant | 88.38 |
| 64  | 8.3982  | Hydrocinnamate          | 3-phenylpropanoate   |     | Non       | 93.09 |
| 10  | 5.444   | Hydroxylamine (3TMS)    |                      |     | Redundant | 79.15 |
| 11  | 5.4444  | Hydroxylamine (3TMS)    |                      |     | Redundant | 79.68 |
| 20  | 6.0345  | Hydroxylamine (3TMS)    |                      |     | Redundant | 80.11 |
| 62  | 8.3091  | Hydroxylamine (3TMS)    | Hydroxylamine        |     | Non       | 91.01 |
| 316 | 19.3167 | Icosanoic acid          | Palmitate            |     | Redundant | 78.79 |
| 208 | 14.0884 | Kojic acid              | Kojic acid           |     | Non       | 91.35 |
| 222 | 14.7929 | Kojic acid              |                      |     | Redundant | 88.58 |
| 162 | 12.3891 | L-(-)-Malic acid (3TMS) | (S)-malate           |     | Non       | 93.16 |
| 46  | 7.4892  | L-(+)-Lactic acid       | Lactate              |     | Non       | 93.96 |
| 126 | 10.842  | L-(+)-Tartarate         | L-tartrate           |     | Non       | 77.44 |
| 148 | 11.7511 | L-2-Aminobutyric acid   | (S)-2-aminobutanoate |     | Redundant | 77.54 |
| 57  | 8.1381  | L-Alanine (3TMS)        | L-alanine            |     | Non       | 99.83 |
| 198 | 13.8477 | L-Alanine (3TMS)        | L-alanine            |     | Redundant | 97    |
| 192 | 13.6667 | L-Aspartic acid (3TMS)  | L-aspartic acid      |     | Redundant | 85.89 |
| 153 | 12.0082 | L-Citrulline            |                      |     | Redundant | 78.45 |
| 234 | 15.2111 | L-Citrulline            | L-citrulline         |     | Non       | 94.34 |
| 190 | 13.5648 | L-Glutamic acid (3TMS)  | L-glutamate          |     | Non       | 95.6  |
| 161 | 12.3272 | L-Glutamine (3TMS)      | L-glutamine          |     | Non       | 93.65 |
| 263 | 16.3733 | L-Glutathione (xTMS)    | S-hexylglutathione   |     | Non       | 97.14 |
| 56  | 8.0894  | L-Histidine (3TMS)      |                      |     | Redundant | 94.82 |
| 96  | 9.9303  | L-Histidine (3TMS)      |                      |     | Redundant | 78.52 |
| 254 | 15.93   | L-Histidine (3TMS)      | L-histidine          |     | Non       | 98.27 |
| 261 | 16.2701 | L-Histidine (3TMS)      |                      |     | Redundant | 91.49 |
| 18  | 5.856   | L-Homocitrulline        | L-Homocitrulline     | Non | Non       | 96.31 |
| 115 | 10.4989 | L-Isoleucine (2TMS)     | L-isoleucine         |     | Non       | 96.08 |
| 165 | 12.5062 | L-Mandelic acid         |                      |     | Redundant | 90.71 |
| 250 | 15.7752 | L-Mandelic acid         |                      |     | Redundant | 94.63 |
| 322 | 19.8796 | L-Mandelic acid         |                      |     | Redundant | 85.76 |
| 326 | 20.165  | L-Mandelic acid         |                      |     | Redundant | 90.32 |
| 329 | 20.8721 | L-Mandelic acid         |                      |     | Redundant | 96.23 |
| 332 | 21.2361 | L-Mandelic acid         | L-Mandelic acid      | Non | Non       | 96.65 |
| 171 | 12.7487 | L-Methionine (2TMS)     | L-methionine         |     | Non       | 98.9  |
| 116 | 10.5035 | L-Norleucine (2TMS)     |                      |     | Redundant | 97.6  |
| 152 | 11.9723 | L-Norleucine (2TMS)     | L-norleucine         |     | Non       | 98    |
| 225 | 14.9865 | L-Norleucine (2TMS)     |                      |     | Redundant | 94.81 |
| 258 | 16.1383 | L-Norleucine (2TMS)     |                      |     | Redundant | 79.71 |
| 85  | 9.6063  | L-Norvaline (4TMS)      | L-norvaline          |     | Non       | 96.88 |
| 233 | 15.1482 | L-Ornithine (2TMS)      | L-ornithine          |     | Non       | 97.54 |

|     |         |                            |                                                  |     |           |       |
|-----|---------|----------------------------|--------------------------------------------------|-----|-----------|-------|
| 196 | 13.7127 | L-Phenylalanine (2TMS)     | L-phenylalanine                                  |     | Non       | 92.32 |
| 16  | 5.7631  | L-Prolinamide              |                                                  |     | Redundant | 93.65 |
| 117 | 10.5958 | L-Proline (2TMS)           | L-proline                                        |     | Non       | 99.7  |
| 189 | 13.5316 | L-Proline (2TMS)           |                                                  |     | Redundant | 87.83 |
| 256 | 16.1265 | L-Proline (2TMS)           |                                                  |     | Redundant | 75.95 |
| 262 | 16.3476 | L-Proline (2TMS)           |                                                  |     | Redundant | 95.25 |
| 270 | 16.7688 | L-Proline (2TMS)           |                                                  |     | Redundant | 96.03 |
| 314 | 19.1777 | L-Proline (2TMS)           |                                                  |     | Redundant | 98.87 |
| 89  | 9.7377  | L-Pyroglutamic acid (2TMS) | 5-oxo-L-proline                                  |     | Non       | 97.81 |
| 1   | 5.1446  | Linolenic acid (1TMS)      |                                                  |     | Redundant | 76.31 |
| 2   | 5.1689  | Linolenic acid (1TMS)      | Linolenic acid                                   | Non | Non       | 81.19 |
| 5   | 5.2047  | Linolenic acid (1TMS)      |                                                  |     | Redundant | 78.84 |
| 170 | 12.6928 | Methyl Dopa                | L-Aspartic acid                                  |     | Non       | 89.64 |
| 276 | 17.0606 | Myo-Inositol (6TMS)        | Myo-inositol                                     |     | Non       | 88.96 |
| 69  | 8.9157  | N-Acetyl-L-Leucine         | Histamine                                        |     | Non       | 76.13 |
| 76  | 9.2003  | N-Acetyl-L-Leucine         |                                                  |     | Redundant | 82.51 |
| 73  | 9.0685  | N-Methyl-DL-Alanine (2TMS) | (S)-2-aminobutanoate                             |     | Non       | 96.82 |
| 6   | 5.2415  | N-Methylethanolamine       | L-alanine                                        |     | Redundant | 76.62 |
| 137 | 11.245  | Nonanoic acid(C9)          | Nonanoic acid                                    | Non | Non       | 87.7  |
| 13  | 5.4797  | O-Succinyl-L-Homoserine    |                                                  |     | Redundant | 85.66 |
| 224 | 14.922  | O-Succinyl-L-Homoserine    | O-succinyl-L-homoserine                          |     | Non       | 95.47 |
| 243 | 15.5024 | O-Succinyl-L-Homoserine    |                                                  |     | Redundant | 87.03 |
| 3   | 5.1959  | Oxalic acid (2TMS)         | Oxalate                                          |     | Non       | 80.95 |
| 4   | 5.1945  | Oxalic acid (2TMS)         |                                                  |     | Redundant | 75.75 |
| 274 | 16.8518 | Palmitic acid (1TMS)       | Palmitate                                        |     | Non       | 84.63 |
| 285 | 17.4307 | Palmitoleate               | Palmitoleate                                     |     | Non       | 84.88 |
| 40  | 7.3012  | Pentachlorophenol (1TMS)   | Pentachlorophenol                                |     | Non       | 75.25 |
| 26  | 6.5008  | Propyleneglycol            | Propane-1,2-diol                                 |     | Non       | 99.31 |
| 79  | 9.3492  | Propyleneglycol            |                                                  |     | Redundant | 93.88 |
| 107 | 10.2732 | Pyrophosphate              | Diphosphate                                      |     | Non       | 90.29 |
| 109 | 10.2224 | Pyrophosphate              |                                                  |     | Redundant | 88.88 |
| 113 | 10.5144 | Pyrophosphate              |                                                  |     | Redundant | 85.16 |
| 220 | 14.6624 | Ribulose-1,5-Bisphosphate  | a [ribulose-1,5-bisphosphate-carboxylase]-lysine |     | Non       | 78.97 |
| 58  | 8.1406  | Shikimic acid (4TMS)       | Shikimate                                        |     | Non       | 88.64 |
| 298 | 18.1401 | Stearic acid (1TMS)        | Stearate                                         |     | Non       | 83.79 |
| 121 | 10.7374 | Succinic acid (2TMS)       | Succinate                                        |     | Non       | 83.04 |
| 144 | 11.6187 | Thymine (2TMS)             | Thymine                                          |     | Non       | 84.23 |
| 130 | 10.9949 | Uracil (2TMS)              | Uracil                                           |     | Non       | 77.58 |
| 104 | 10.1815 | Urea                       | Urea                                             |     | Non       | 93.85 |
| 277 | 17.0604 | Xylitol                    | Xylitol                                          |     | Non       | 79.64 |

**Table S3.** Normalized metabolite peaks' areas of M4 and M5 mutants respect to wild type values at 22 h and 46 h. In red are highlighted the values higher than 1 and in blue the values lower than 1. The colour intensities are directly proportional to the numerical level.

| Variable ID | EcoCyc name (consensus)                          | M4 22h | M5 22h | M4 46h | M5 46h |
|-------------|--------------------------------------------------|--------|--------|--------|--------|
| 254         | L-histidine                                      | 1.44   | 1.57   | 1.39   | 6.30   |
| 297         | Cadaverine                                       | 1.16   | 2.47   | 1.58   | 3.66   |
| 216         | Glycerol 2-phosphate                             | 0.87   | 1.73   | 0.77   | 3.09   |
| 232         | Citrate                                          | 0.41   | 0.49   | 0.47   | 2.91   |
| 152         | L-norleucine                                     | 1.83   | 3.44   | 1.14   | 2.72   |
| 255         | L-dopa                                           | 1.40   | 1.66   | 1.12   | 2.72   |
| 263         | S-hexylglutathione                               | 1.37   | 2.27   | 0.93   | 2.67   |
| 208         | Kojic acid                                       | 2.72   | 2.04   | 2.50   | 2.67   |
| 182         | glutathione disulfide                            | 1.60   | 2.21   | 1.07   | 2.48   |
| 136         | Hypotaaurine                                     | 1.05   | 1.07   | 1.68   | 2.44   |
| 220         | a [ribulose-1,5-bisphosphate-carboxylase]-lysine | 0.89   | 1.00   | 0.50   | 2.31   |
| 233         | L-ornithine                                      | 1.90   | 2.07   | 1.25   | 2.15   |
| 234         | L-citrulline                                     | 1.57   | 1.82   | 1.10   | 1.97   |
| 289         | DL-Pipecolic acid                                | 1.25   | 1.92   | 0.99   | 1.87   |
| 290         | 5-aminopentanoate                                | 1.27   | 1.60   | 1.23   | 1.83   |
| 190         | L-glutamate                                      | 1.12   | 1.15   | 0.78   | 1.83   |
| 171         | L-methionine                                     | 1.32   | 1.56   | 1.13   | 1.74   |
| 104         | Urea                                             | 1.23   | 0.87   | 1.19   | 1.73   |
| 276         | Myo-inositol                                     | 1.53   | 1.66   | 1.28   | 1.71   |
| 18          | L-Homocitrulline                                 | 1.27   | 1.49   | 1.29   | 1.70   |
| 42          | Harmaline                                        | 0.89   | 1.71   | 0.93   | 1.66   |
| 86          | DL-norvaline                                     | 1.18   | 1.21   | 1.34   | 1.57   |
| 224         | O-succinyl-L-homoserine                          | 1.26   | 1.00   | 0.95   | 1.55   |
| 179         | 6-Hydroxynicotinic acid                          | 0.86   | 1.40   | 1.16   | 1.50   |
| 57          | L-alanine                                        | 1.58   | 1.61   | 1.33   | 1.48   |
| 162         | (S)-malate                                       | 0.73   | 0.97   | 0.34   | 1.42   |
| 50          | Glycolate                                        | 1.19   | 1.46   | 0.88   | 1.37   |
| 332         | L-Mandelic acid                                  | 1.25   | 1.85   | 0.84   | 1.37   |
| 144         | Thymine                                          | 0.72   | 1.25   | 0.69   | 1.35   |
| 210         | Dethiobiotin                                     | 1.09   | 1.29   | 1.32   | 1.34   |
| 66          | 4-Hydroxypyridine                                | 1.06   | 1.50   | 0.93   | 1.28   |
| 126         | L-tartrate                                       | 1.32   | 1.28   | 1.07   | 1.24   |
| 285         | Palmitoleate                                     | 0.90   | 1.31   | 0.77   | 1.23   |
| 115         | L-isoleucine                                     | 1.18   | 1.15   | 1.12   | 1.23   |
| 277         | Xylitol                                          | 1.49   | 1.86   | 1.33   | 1.21   |
| 73          | (S)-2-aminobutanoate                             | 1.23   | 1.27   | 1.00   | 1.20   |
| 85          | L-norvaline                                      | 1.10   | 1.11   | 1.04   | 1.19   |
| 39          | 2-Hydroxypyridine                                | 1.13   | 1.59   | 1.08   | 1.17   |
| 202         | Galactitol                                       | 0.85   | 1.50   | 0.60   | 1.16   |
| 196         | L-phenylalanine                                  | 1.01   | 1.03   | 1.01   | 1.15   |

|     |                              |      |      |      |      |
|-----|------------------------------|------|------|------|------|
| 89  | 5-oxo-L-proline              | 1.24 | 1.21 | 1.14 | 1.07 |
| 40  | Pentachlorophenol            | 1.12 | 1.21 | 1.02 | 1.04 |
| 172 | 5-oxo-D-proline              | 1.03 | 1.01 | 1.00 | 1.03 |
| 29  | D-arabinose                  | 0.90 | 1.13 | 1.25 | 0.96 |
| 117 | L-proline                    | 1.45 | 0.83 | 1.18 | 0.94 |
| 69  | Histamine                    | 1.15 | 1.42 | 0.93 | 0.92 |
| 24  | D-galactosamine              | 1.04 | 1.08 | 1.14 | 0.91 |
| 242 | D-Fucose                     | 1.04 | 1.23 | 0.81 | 0.91 |
| 132 | Fumarate                     | 0.97 | 0.68 | 0.59 | 0.87 |
| 298 | Stearate                     | 1.11 | 1.35 | 0.85 | 0.85 |
| 161 | L-glutamine                  | 1.04 | 1.08 | 0.86 | 0.85 |
| 274 | Palmitate                    | 1.05 | 1.16 | 0.85 | 0.84 |
| 2   | Linolenic acid               | 1.43 | 1.02 | 0.59 | 0.81 |
| 82  | Gallate                      | 1.08 | 1.08 | 0.83 | 0.80 |
| 212 | Lactitol                     | 0.96 | 0.75 | 0.83 | 0.77 |
| 44  | Creatinine                   | 0.30 | 0.28 | 0.94 | 0.75 |
| 107 | Diphosphate                  | 1.06 | 1.25 | 1.11 | 0.73 |
| 278 | D-arabinose 5-phosphate      | 0.54 | 0.97 | 0.43 | 0.72 |
| 62  | Hydroxylamine                | 1.04 | 0.92 | 0.86 | 0.71 |
| 46  | Lactate                      | 0.22 | 0.35 | 1.00 | 0.70 |
| 103 | Benzoate                     | 0.75 | 0.75 | 0.76 | 0.66 |
| 58  | Shikimate                    | 1.04 | 1.01 | 0.70 | 0.66 |
| 247 | Adenine                      | 0.93 | 1.48 | 0.55 | 0.55 |
| 80  | Glycerol                     | 0.91 | 0.67 | 0.79 | 0.55 |
| 64  | 3-phenylpropanoate           | 1.09 | 1.04 | 0.82 | 0.53 |
| 201 | L-Homocysteine               | 0.99 | 0.88 | 0.91 | 0.52 |
| 130 | Uracil                       | 0.96 | 0.73 | 0.71 | 0.49 |
| 170 | L-Aspartic acid              | 1.04 | 0.98 | 0.29 | 0.48 |
| 37  | DL-2,3-Diaminopropionic acid | 1.05 | 0.76 | 1.21 | 0.48 |
| 105 | Dopamine                     | 1.04 | 0.51 | 1.01 | 0.47 |
| 137 | Nonanoic acid                | 0.85 | 0.96 | 0.65 | 0.44 |
| 183 | Protocatechuate              | 1.80 | 0.96 | 1.12 | 0.42 |
| 186 | (-)-Epinephrine              | 0.70 | 1.39 | 0.75 | 0.38 |
| 3   | Oxalate                      | 0.94 | 0.81 | 0.45 | 0.36 |
| 333 | S-methyl-5'-thioadenosine    | 0.64 | 1.39 | 0.49 | 0.34 |
| 154 | D-homoserine                 | 0.67 | 1.04 | 0.50 | 0.23 |
| 26  | Propane-1,2-diol             | 0.71 | 0.76 | 1.41 | 0.10 |
| 121 | Succinate                    | 0.18 | 0.18 | 0.11 | 0.10 |

**Table S4.** Mean, standard deviation and relativized values respect to M5 strain and also respect to the M5 with empty vector(s) at 46 (a) and 70 h (b) of the following parameters: of the Specific H<sub>2</sub> production and ethanol production (mmol/gCDW), H<sub>2</sub> and ethanol molar yield (mmol/mmol glycerol consumed), specific succinate and acetate efflux (mmol/gCDW), specific glycerol consumption (mmol glycerol consumed/gCDW), volumetric H<sub>2</sub> production (mmol/L) and growth biomass referred as cell dried weight per liter (CDW/L).

a)

|      |                       | Y <sub>H2</sub> X |      |                      |                         | Y <sub>E</sub> X |       |                      |                         | Y <sub>H2</sub> glyc cons |      |                      |                         | Y <sub>E</sub> glyc cons |      |                      |                         | Y <sub>Succ</sub> X |      |                      |                         |
|------|-----------------------|-------------------|------|----------------------|-------------------------|------------------|-------|----------------------|-------------------------|---------------------------|------|----------------------|-------------------------|--------------------------|------|----------------------|-------------------------|---------------------|------|----------------------|-------------------------|
| ID2  | Strains               | Mean              | S.D. | Relativ empty vector | Relativ with Ref strain | Mean             | S.D.  | Relativ empty vector | Relativ with Ref strain | Mean                      | S.D. | Relativ empty vector | Relativ with Ref strain | Mean                     | S.D. | Relativ empty vector | Relativ with Ref strain | Mean                | S.D. | Relativ empty vector | Relativ with Ref strain |
| 990  | M5                    | 28.94             | 4.49 | 1                    | 1.00                    | 59.12            | 9.69  | 1                    | 1.00                    | 0.56                      | 0.05 | 1                    | 1.00                    | 1.13                     | 0.04 | 1                    | 1.00                    | 1.48                | 0.29 | 1                    | 1.00                    |
| 991  | M5/pB-K               | 20.39             | 2.76 | 0.00                 | 0.70                    | 48.29            | 8.83  | 0.00                 | 0.82                    | 0.45                      | 0.03 | 0.00                 | 0.82                    | 1.07                     | 0.04 | 0.00                 | 0.94                    | 1.57                | 0.26 | 0.00                 | 1.06                    |
| 992  | M5/pB-K+pT            | 26.06             | 1.86 | 0.00                 | 0.90                    | 61.85            | 6.83  | 0.00                 | 1.05                    | 0.46                      | 0.01 | 0.00                 | 0.83                    | 1.10                     | 0.05 | 0.00                 | 0.97                    | 1.89                | 0.22 | 0.00                 | 1.27                    |
| 995  | M5/pB-K-CIT           | 27.00             | 6.57 | 1.32                 | 0.93                    | 62.44            | 15.90 | 1.29                 | 1.06                    | 0.52                      | 0.02 | 1.14                 | 0.93                    | 1.19                     | 0.08 | 1.12                 | 1.05                    | 1.47                | 0.36 | 0.94                 | 0.99                    |
| 999  | M5/pB-K-CIT+pT-pepck  | 30.65             | 3.98 | 1.18                 | 1.06                    | 66.45            | 13.17 | 1.07                 | 1.12                    | 0.54                      | 0.03 | 1.16                 | 0.97                    | 1.16                     | 0.08 | 1.06                 | 1.03                    | 1.57                | 0.17 | 0.83                 | 1.06                    |
| 1001 | M5/pB-K-CIT+ pBA-maeA | 30.38             | 5.46 | 1.49                 | 1.05                    | 65.53            | 12.35 | 1.36                 | 1.11                    | 0.55                      | 0.04 | 1.21                 | 0.99                    | 1.19                     | 0.07 | 1.11                 | 1.05                    | 1.31                | 0.18 | 0.83                 | 0.88                    |

|                       |  | Y <sub>Succ</sub> X |      |                      |                         | Y <sub>acetate</sub> X |      |                      |                         | Glyc cons/X |      |                      |                         | Y <sub>H2</sub> |      |                      |                         | CDW (g/L) |      |                      |                         |
|-----------------------|--|---------------------|------|----------------------|-------------------------|------------------------|------|----------------------|-------------------------|-------------|------|----------------------|-------------------------|-----------------|------|----------------------|-------------------------|-----------|------|----------------------|-------------------------|
| Strains               |  | Mean                | S.D. | Relativ empty vector | Relativ with Ref strain | Mean                   | S.D. | Relativ empty vector | Relativ with Ref strain | Mean        | S.D. | Relativ empty vector | Relativ with Ref strain | Mean            | S.D. | Relativ empty vector | Relativ with Ref strain | Mean      | S.D. | Relativ empty vector | Relativ with Ref strain |
| M5                    |  | 1.48                | 0.29 | 1                    | 1.00                    | 24.10                  | 3.60 | 1                    | 1.00                    | 52.44       | 9.24 | 1                    | 1.00                    | 11.44           | 0.89 | 1                    | 1.00                    | 0.40      | 0.08 | 1                    | 1.00                    |
| M5/pB-K               |  | 1.57                | 0.26 | 0.00                 | 1.06                    | 27.44                  | 4.26 | 0.00                 | 1.14                    | 45.17       | 7.03 | 0.00                 | 0.86                    | 7.29            | 0.89 | 0.00                 | 0.64                    | 0.37      | 0.09 | 0.00                 | 0.91                    |
| M5/pB-K+pT            |  | 1.89                | 0.22 | 0.00                 | 1.27                    | 29.66                  | 3.33 | 0.00                 | 1.23                    | 56.18       | 4.01 | 0.00                 | 1.07                    | 8.49            | 1.48 | 0.00                 | 0.74                    | 0.32      | 0.05 | 0.00                 | 0.80                    |
| M5/pB-K-CIT           |  | 1.47                | 0.36 | 0.94                 | 0.99                    | 21.44                  | 5.73 | 0.78                 | 0.89                    | 52.44       | 9.24 | 1.16                 | 1.00                    | 11.35           | 1.21 | 1.56                 | 0.99                    | 0.45      | 0.16 | 1.23                 | 1.12                    |
| M5/pB-K-CIT+pT-pepck  |  | 1.57                | 0.17 | 0.83                 | 1.06                    | 22.36                  | 2.99 | 0.75                 | 0.93                    | 52.44       | 9.24 | 0.93                 | 1.00                    | 12.48           | 0.64 | 1.47                 | 1.09                    | 0.41      | 0.06 | 1.27                 | 1.02                    |
| M5/pB-K-CIT+ pBA-maeA |  | 1.31                | 0.18 | 0.83                 | 0.88                    | 21.08                  | 4.10 | 0.77                 | 0.87                    | 52.44       | 9.24 | 1.16                 | 1.00                    | 13.24           | 1.32 | 1.82                 | 1.16                    | 0.45      | 0.09 | 1.22                 | 1.11                    |

b)

|      |                      | Y <sub>H2</sub> X |      |                      |                 | Y <sub>E</sub> X |      |                      |                 | Y <sub>H2</sub> glyc cons |      |                      |                 | Y <sub>E</sub> glyc cons |      |                      |                 |
|------|----------------------|-------------------|------|----------------------|-----------------|------------------|------|----------------------|-----------------|---------------------------|------|----------------------|-----------------|--------------------------|------|----------------------|-----------------|
| ID2  | Strains              | Mean              | S.D. | Relativ empty vector | Relativ with wt | Mean             | S.D. | Relativ empty vector | Relativ with wt | Mean                      | S.D. | Relativ empty vector | Relativ with wt | Mean                     | S.D. | Relativ empty vector | Relativ with wt |
| 1003 | M5                   | 42.52             | 4.50 | 0.00                 | 1.00            | 79.05            | 3.74 | 0.00                 | 1.00            | 0.63                      | 0.04 | 0.00                 | 1.00            | 1.18                     | 0.03 | 0.00                 | 1.00            |
| 1004 | M5/pB-K              | 36.43             | 4.54 | 0.00                 | 0.86            | 78.16            | 7.51 | 0.00                 | 0.99            | 0.51                      | 0.02 | 0.00                 | 0.81            | 1.10                     | 0.01 | 0.00                 | 0.94            |
| 1005 | M5/pB-K+pT           | 34.56             | 2.98 | 0.00                 | 0.81            | 77.87            | 5.65 | 0.00                 | 0.99            | 0.48                      | 0.01 | 0.00                 | 0.77            | 1.09                     | 0.02 | 0.00                 | 0.93            |
| 1006 | M5/pB-K-CIT          | 44.08             | 2.77 | 1.21                 | 1.04            | 105.44           | 4.12 | 1.35                 | 1.33            | 0.53                      | 0.01 | 1.03                 | 0.84            | 1.27                     | 0.01 | 1.15                 | 1.08            |
| 1007 | M5/pB-K-CIT+pT-pepck | 43.07             | 4.95 | 1.25                 | 1.01            | 97.02            | 9.92 | 1.25                 | 1.23            | 0.55                      | 0.01 | 1.14                 | 0.87            | 1.24                     | 0.01 | 1.14                 | 1.06            |
| 1008 | M5/pB-K-CIT+pBA-maeA | 45.15             | 3.74 | 1.24                 | 1.06            | 95.05            | 7.95 | 1.22                 | 1.20            | 0.59                      | 0.01 | 1.15                 | 0.93            | 1.24                     | 0.01 | 1.13                 | 1.06            |

|                      |  | Y <sub>Succ</sub> X |      |                      |                 | Y <sub>acetate</sub> X |      |                      |                 | Glyc cons/X |      |                      |                 | Y <sub>H2</sub> |      |                      |                 | CDW (g/L) |      |                      |                         |
|----------------------|--|---------------------|------|----------------------|-----------------|------------------------|------|----------------------|-----------------|-------------|------|----------------------|-----------------|-----------------|------|----------------------|-----------------|-----------|------|----------------------|-------------------------|
| Strains              |  | Mean                | S.D. | Relativ empty vector | Relativ with wt | Mean                   | S.D. | Relativ empty vector | Relativ with wt | Mean        | S.D. | Relativ empty vector | Relativ with wt | Mean            | S.D. | Relativ empty vector | Relativ with wt | Mean      | S.D. | Relativ empty vector | Relativ with Ref strain |
| M5                   |  | 1.82                | 0.07 | 0.00                 | 1.00            | 30.09                  | 1.20 | 0.00                 | 1.00            | 67.22       | 2.98 | 0.00                 | 1.00            | 12.91           | 1.29 | 0.00                 | 1.00            | 0.30      | 0.00 | 1.00                 | 1.00                    |
| M5/pB-K              |  | 2.41                | 0.19 | 0.00                 | 1.33            | 38.36                  | 1.59 | 0.00                 | 1.28            | 70.79       | 5.95 | 0.00                 | 1.05            | 8.89            | 0.58 | 0.00                 | 0.69            | 0.25      | 0.01 | 0.00                 | 0.84                    |
| M5/pB-K+pT           |  | 2.39                | 0.18 | 0.00                 | 1.32            | 38.15                  | 2.77 | 0.00                 | 1.27            | 71.35       | 6.22 | 0.00                 | 1.06            | 8.33            | 0.28 | 0.00                 | 0.64            | 0.25      | 0.01 | 0.00                 | 0.84                    |
| M5/pB-K-CIT          |  | 2.12                | 0.12 | 0.88                 | 1.16            | 24.74                  | 2.53 | 0.64                 | 0.82            | 83.24       | 3.93 | 1.18                 | 1.24            | 14.12           | 0.57 | 1.59                 | 1.09            | 0.31      | 0.01 | 1.24                 | 1.03                    |
| M5/pB-K-CIT+pT-pepck |  | 2.07                | 0.19 | 0.86                 | 1.14            | 25.18                  | 2.70 | 0.66                 | 0.84            | 78.06       | 7.48 | 1.09                 | 1.16            | 15.59           | 0.45 | 1.87                 | 1.21            | 0.35      | 0.03 | 1.38                 | 1.15                    |
| M5/pB-K-CIT+pBA-maeA |  | 1.76                | 0.20 | 0.73                 | 0.97            | 24.11                  | 3.18 | 0.63                 | 0.80            | 76.48       | 6.58 | 1.08                 | 1.14            | 15.95           | 0.40 | 1.79                 | 1.24            | 0.34      | 0.03 | 1.34                 | 1.12                    |



**Figure S1.** Discriminant Function (DF) loadings respect to wavenumbers ( $\text{cm}^{-1}$ ) extracted from multivariate analysis of FT-IR data performed in M4, M5 and wild type strains at 22 and 46h.

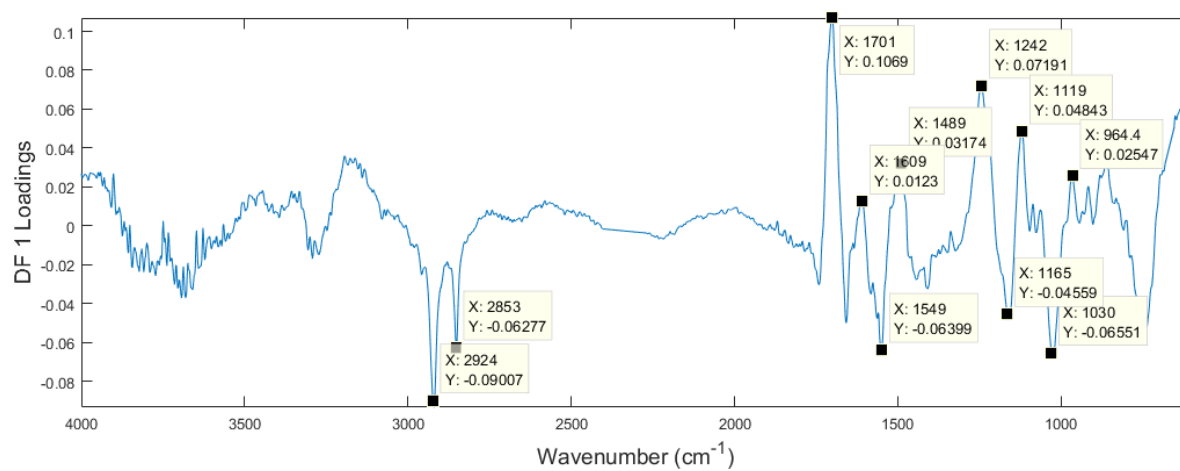

**Figure S2.** Plot of PC1 and PC2 loadings from GC-MS data of M4, M5 and wild type strains at 22 and 46 h (a), table of compounds with highest loading plots values remarked with arrows in the right positive of PCA and in the red the Match factor values lower than 75 and (b) box plots of compounds with match factor higher than 75, obtained from the table below the plot.

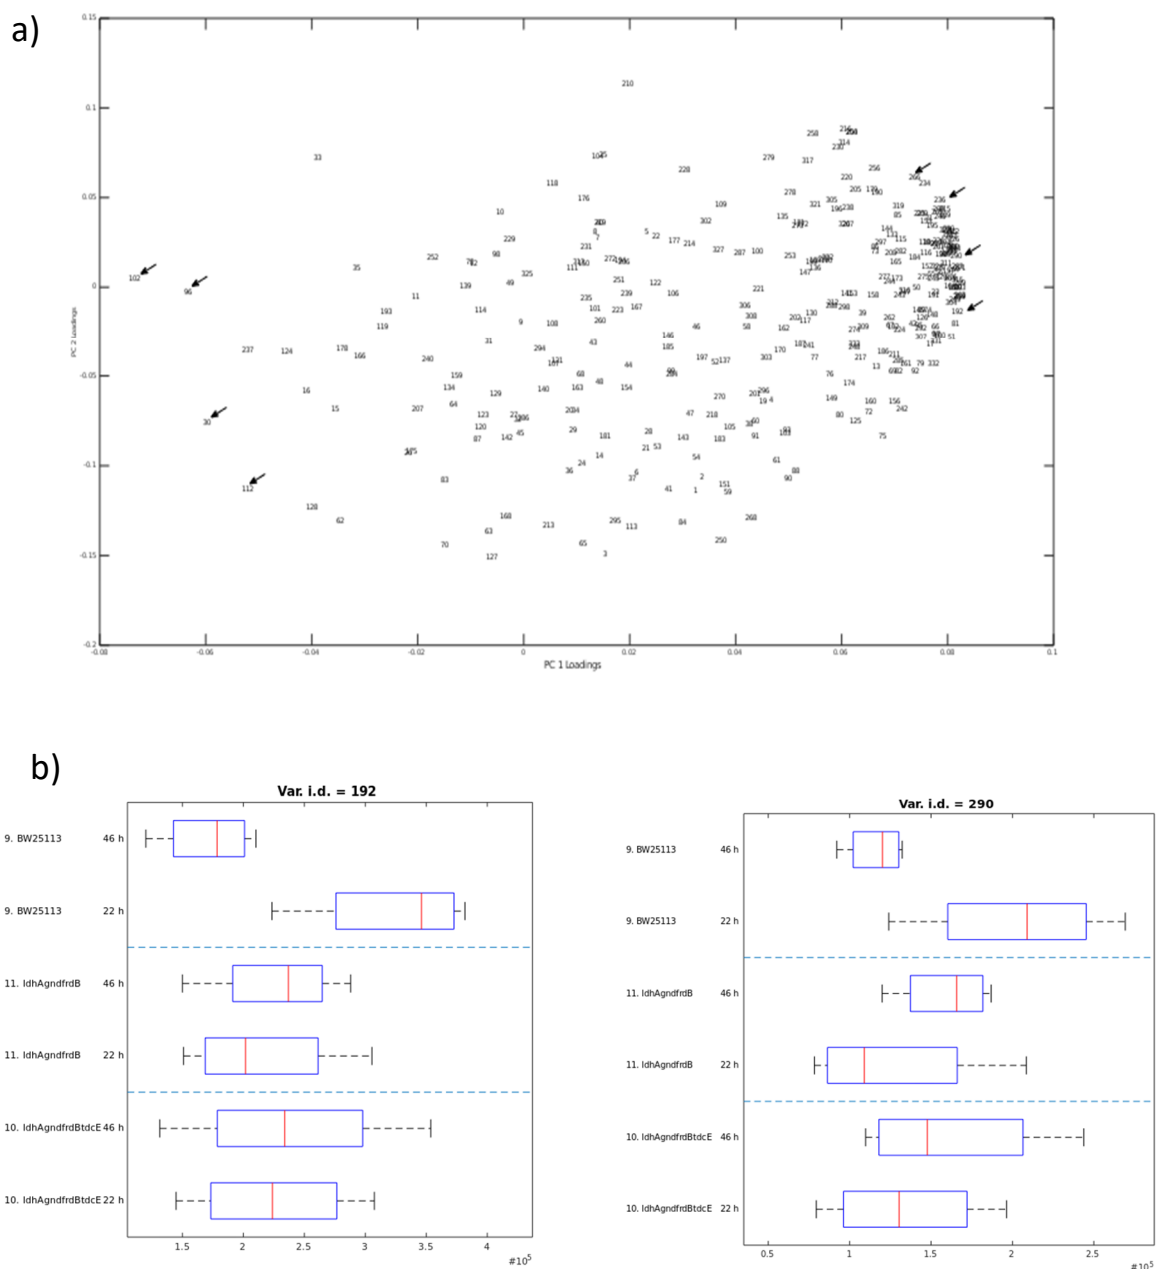

| Compound ID | Retention Time | Name                               | Match Factor |
|-------------|----------------|------------------------------------|--------------|
| 192         | 13.6667        | Methyl Dopa                        | 92.24        |
| 236         | 15.2598        | 16-Hydroxyhexadecanoic acid (2TMS) | 24.56        |
| 266         | 16.5631        | L-Kynurenine                       | 33.98        |
| 290         | 17.6208        | 5-Aminovaleric acid                | 88.46        |

**Figure S3.** Relativized omics data obtained from the refined list of 78 metabolites (**Supplementary material Table S3**) of M4 and M5 average values ( $n=4$ ) respect to wild type strain ones. The set of panels, represent each one a system of cellular function, e.g. Biosynthesis. For each panel, it is shown a graph depicting omics data for each of a set of subsystems, e.g. Amino Acid Biosynthesis (AA Syn) and Carbohydrates Biosynthesis (Carbo Syn). Each panel has its own y-axis, so that omics data for the different subsystems within a panel can readily be compared with each other. Multiple timepoints or experimental conditions are plotted as separate data series within the graph. Clicking on the plot for a given subsystem brings up a detail panel, breaking that subsystem down further into its component subsystems. At the lowest level, the values along the x-axis correspond to the individual objects in the dataset in this case metabolites for metabolomics data. Each subsystem metabolic pathway is ordered in decreasing changes between series since left to right.

Pathway Tools Omics Dashboard for *Escherichia coli* K-12 substr. MG1655

M4 22h M5 22h M4 46h M5 46h

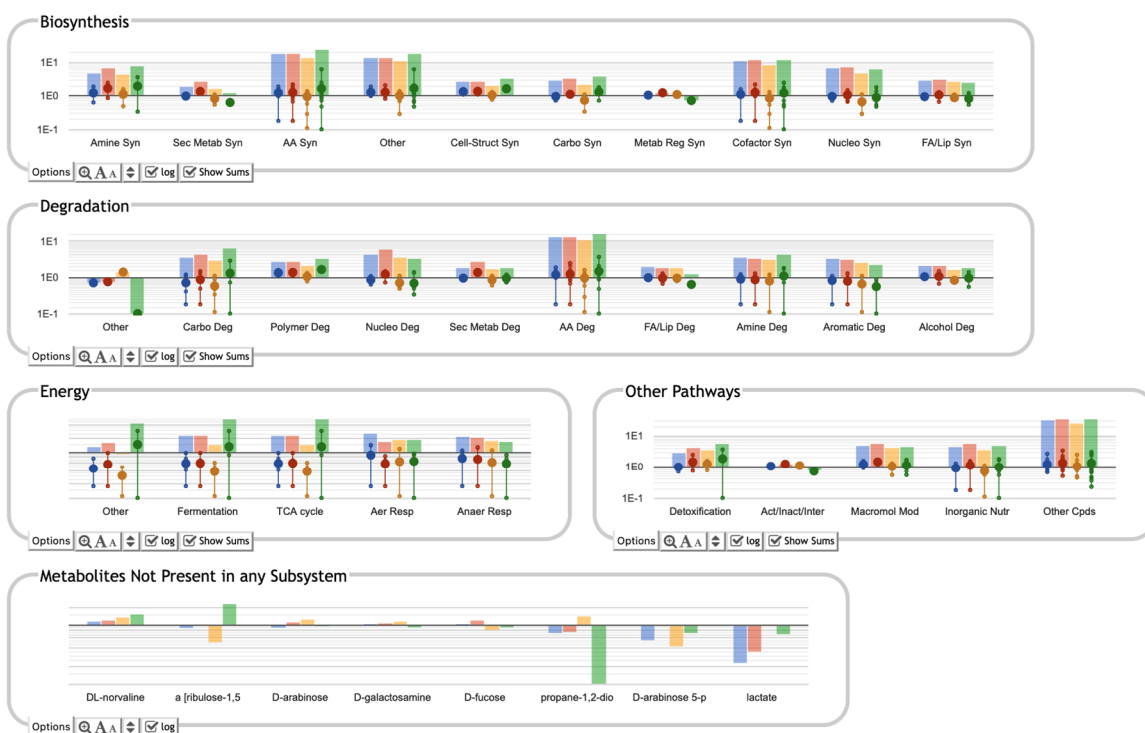

**Figure S4.** Subsystems obtained from each panel or metabolic pathway classes (extracted from the omics data overview in Figure S3).

a) Biosynthesis

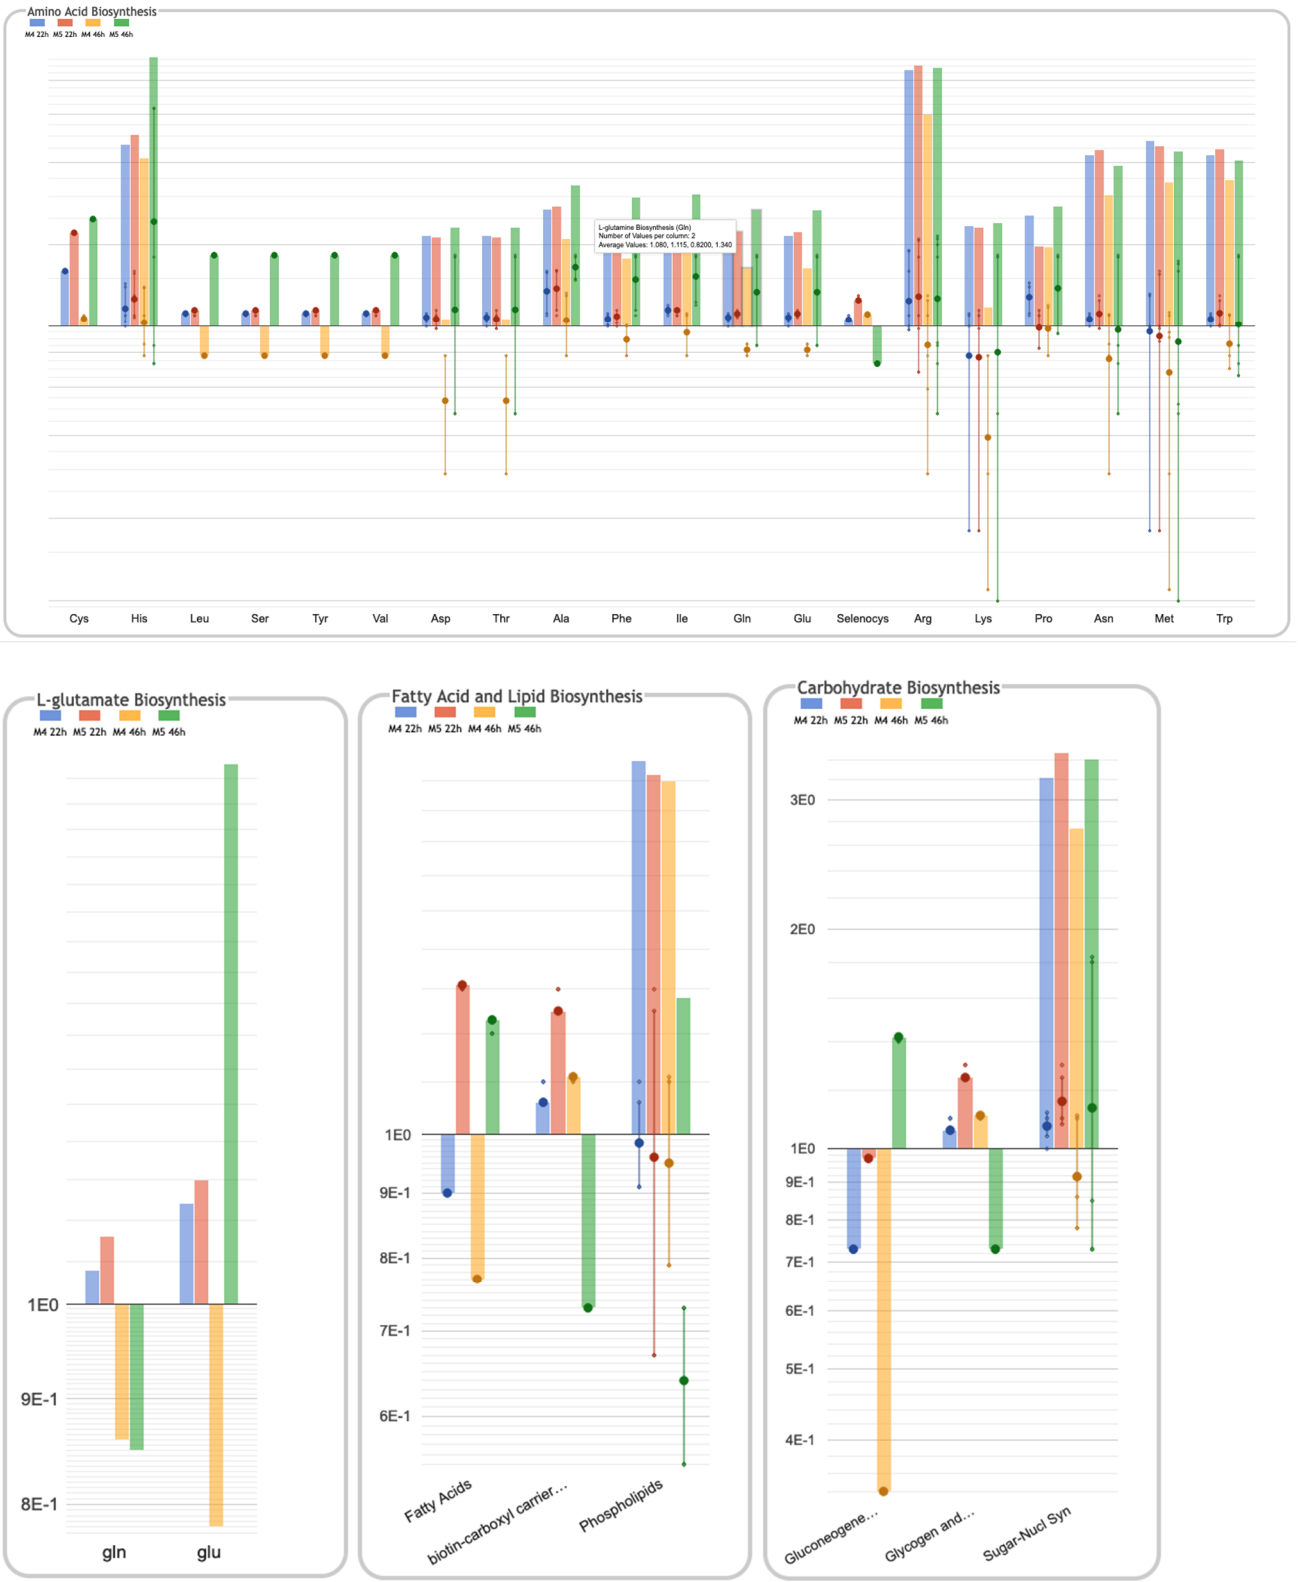

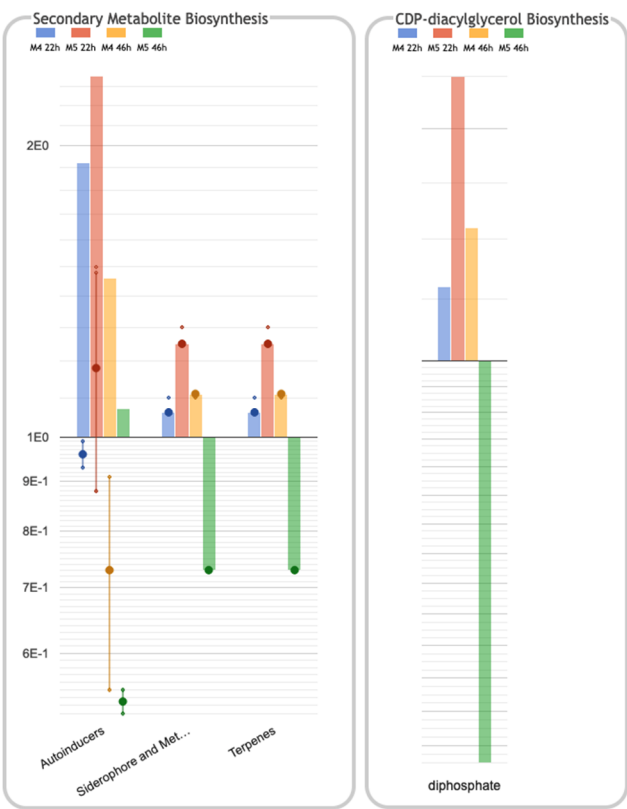

b) Degradation

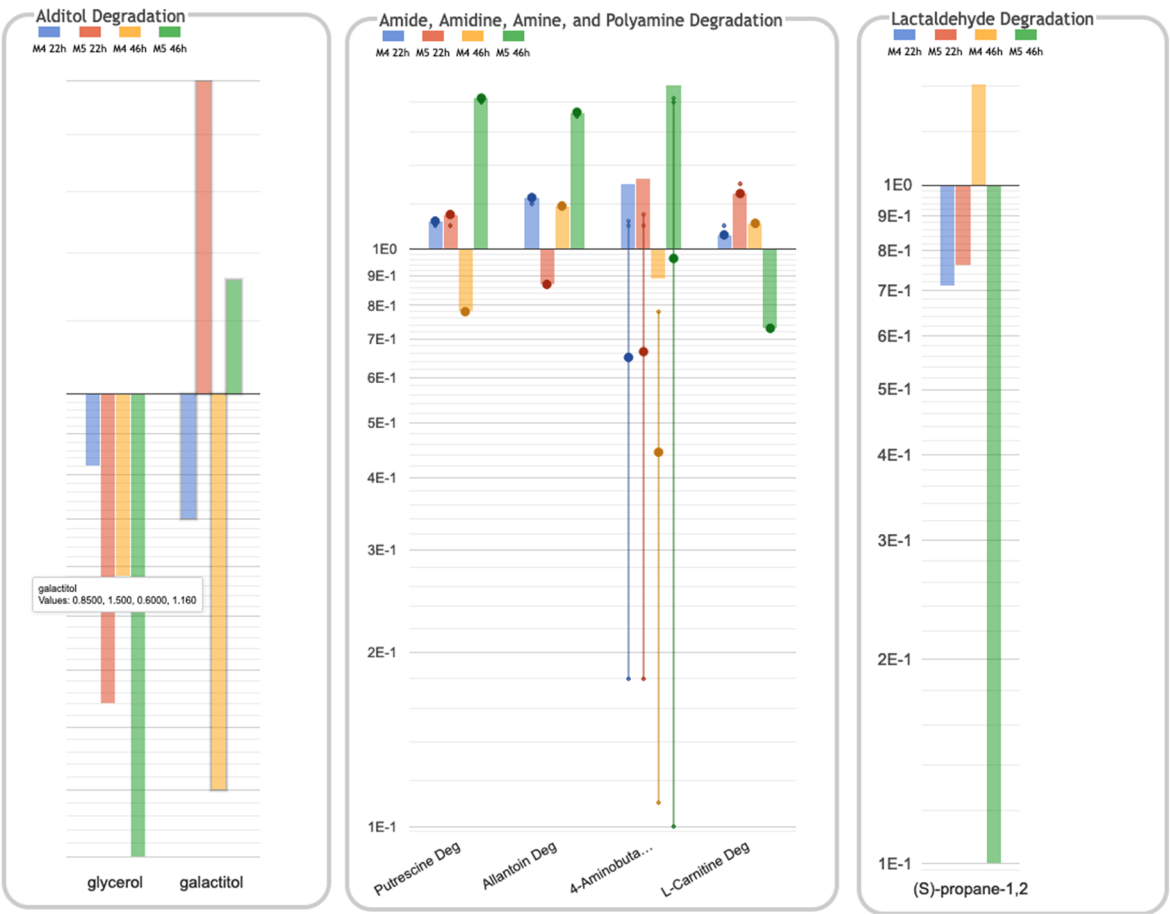

**Figure S5.** Box plot of intracellular (a) fumarate and (b) succinate peak's areas obtained in M4, M5 and wild type strains biomass collected at 22 and 46 h. In asterisk are shown statistical significant differences respect to wild type strain values with a  $p$ -value  $<0.001$  (\*\*\*)

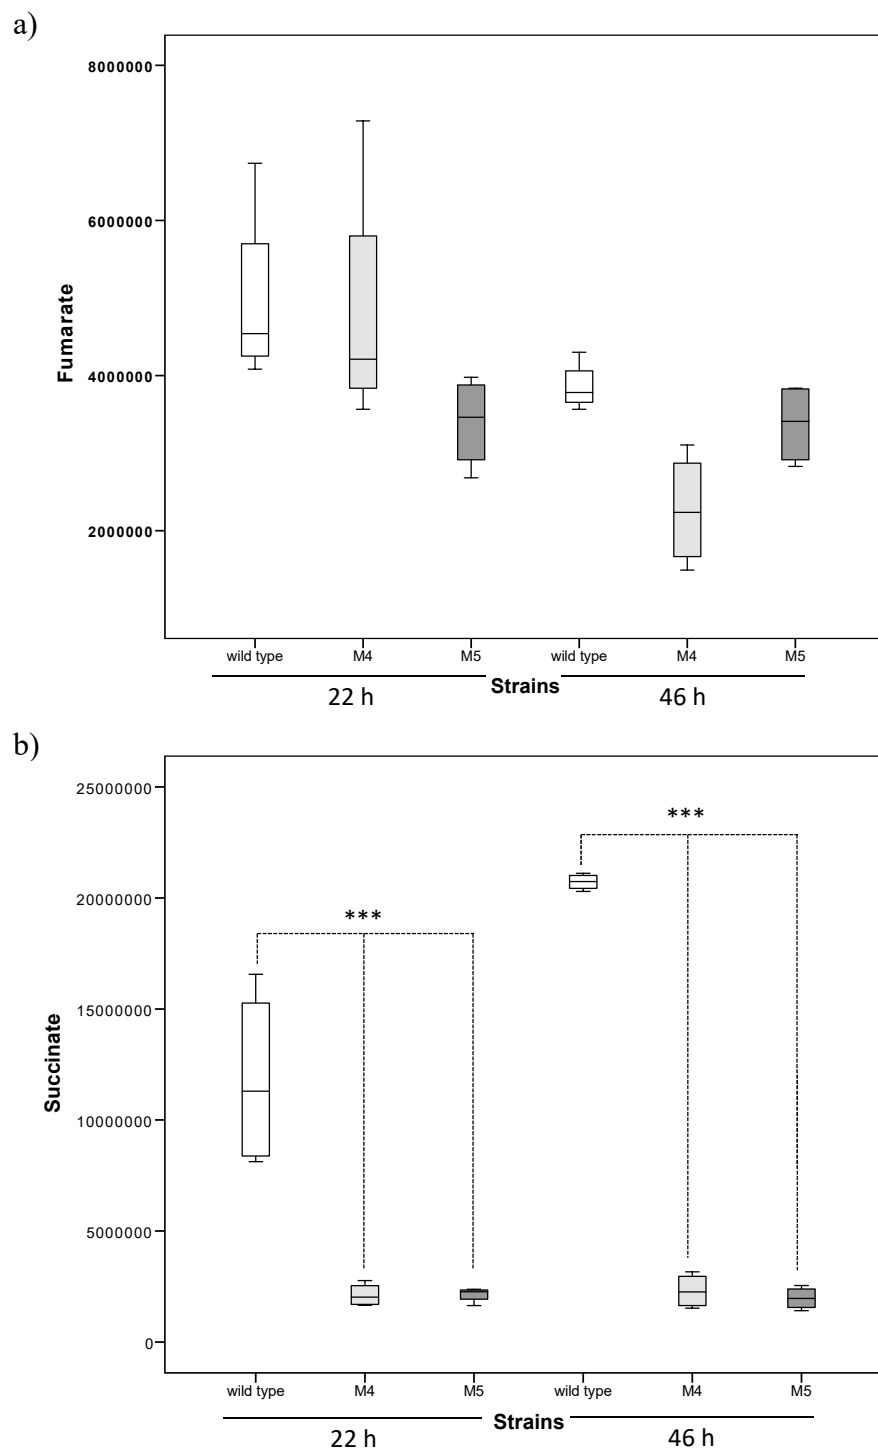

**Figure S6.** Scatter plots of average and standard deviations of: a) specific  $H_2$  production; b) specific ethanol production; c) glycerol remained in mmol /gCDW; d) biomass growth in cell dried weight per liter (CDW/L), e)  $H_2$  molar yield and f) ethanol molar yield in mmol/mmol glycerol consumed. These parameters have been obtained at 46 and 70 h in the following strains: M5/pB-K, M5/pB-K+pT (denoted as reference strains) M5/pB-K-CIT, M5/pB-K-CIT+pT-pepck, M5/pB-K-CIT+pBA-maeA (denoted as strains with overexpressions).

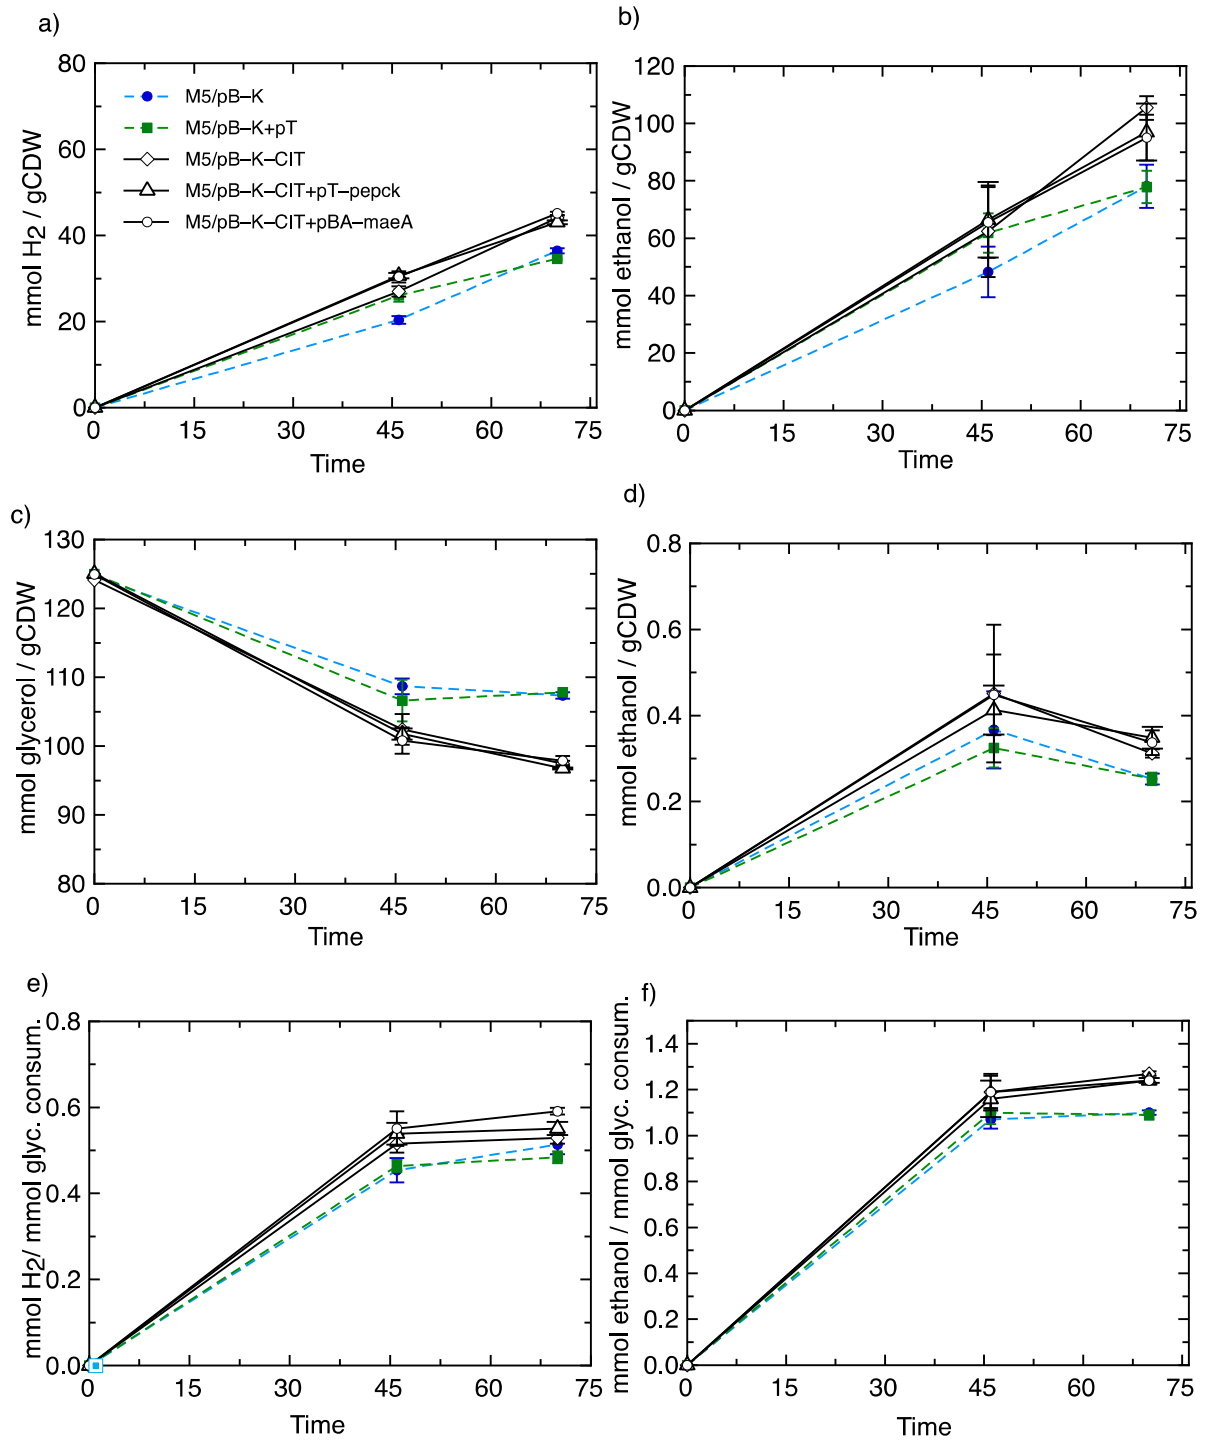

Supplement: s1 [file s1]
